# Supplementary material for: Integrated Multitrophic Aquaculture; Analysing Contributions of Different Biological Compartments to Nutrient Removal in a Duckweed-Based Water Remediation System
Source: MDPI journal article supplement (doi:10.3390/plants11223103), 2022-11-15
Supplement: s1 [file s1]

| Before starting the experiment |   |                                                                                                                                                   |                     |
|--------------------------------|---|---------------------------------------------------------------------------------------------------------------------------------------------------|---------------------|
|                                | 1 | Placement of 6 tanks inside the canal for 7days to allow establishment of natural biofilm in the internal surface                                 |                     |
|                                | 2 | Removal of tanks from the canal                                                                                                                   |                     |
|                                | 3 | Sun-drying of three tanks and scraping of dried biofilm from the internal surface of the tanks                                                    |                     |
|                                | 4 | Ashing of half of the biofilm scraped to determine the organic fraction                                                                           |                     |
|                                | 5 | Analyses of the other half to quantify TN and TP in the initial biofilm                                                                           |                     |
|                                | 6 | Burial of three tanks next the canal, leaving approximately 5 cm above the ground                                                                 |                     |
|                                | 7 | Filling of each tank with 70 l of water pumped from the canal                                                                                     |                     |
|                                | 8 | Placement of approximately 800 cm <sup>2</sup> of duckweed mat, collected from the canal, in each tank                                            |                     |
|                                |   | Collection, weighting, and drying of three samples of duckweed of equal area for the determination of indicative TN and TP in the initial biomass |                     |
| Daily operations               |   |                                                                                                                                                   |                     |
| 8:00 am                        | 1 | Measurement of chlorophyll and cyanobacteria concentration                                                                                        | Repeated for 8 days |
|                                | 2 | Measurement of pH and water temperature                                                                                                           |                     |
|                                | 3 | Collection of a water sample per tank                                                                                                             |                     |
|                                | 4 | Removal of water from the tank using a pump, slowly, without disrupting the duckweed mat                                                          |                     |
|                                | 5 | Collection of 1 water samples from the canal                                                                                                      |                     |
|                                | 6 | Refillmment of tanks with 70 l of water pumped in from the canal                                                                                  |                     |
| 8:00 pm                        | 1 | Measurement of Chlorophyll and cyanobacteria concentration                                                                                        |                     |
|                                | 2 | Measurement of pH and water temperature                                                                                                           |                     |
|                                | 3 | Collection of 1 water sample per tank                                                                                                             |                     |
|                                | 4 | Removal of water from the tank using a pump, slowly, without disrupting the duckweed mat                                                          |                     |
|                                | 5 | Collection of 1 sample of water pumped in from the canal                                                                                          |                     |
|                                | 6 | Refilling of tanks with 70 l of water pumped in from the canal                                                                                    |                     |
| End of the experiment          |   |                                                                                                                                                   |                     |
|                                | 1 | Collection of duckweed mat from the three tanks and drying for the determination of TN and TP                                                     |                     |
|                                | 2 | Removal of water from the tanks                                                                                                                   |                     |
|                                | 3 | Sun-drying of the tanks                                                                                                                           |                     |
|                                | 4 | Ashing of half of the biofilm scraped to determine the organic fraction                                                                           |                     |
|                                | 5 | Analyses of the other half to quantify TN and TP in the final biofilm                                                                             |                     |

**Table S1.** Summary of the experimental protocol
